# Supplementary material
Source: PubMed Central journal article supplement (PMC6645943)
Supplement: ao8b00627_si_001.pdf [file ao8b00627_si_001.pdf]

# **Potentiometric adsorption isotherm analysis of molecularly imprinted polymer interface for small-biomolecule recognition**

Shoichi Nishitani<sup>†</sup> and Toshiya Sakata<sup>\*†</sup>

<sup>†</sup>Department of Materials Engineering, School of Engineering, The University of Tokyo, 7-3-1 Hongo, Bunkyo-ku, Tokyo 113-8656, Japan

\*Corresponding author. E-mail: [sakata@biofet.t.u-tokyo.ac.jp](mailto:sakata@biofet.t.u-tokyo.ac.jp)

TITLE RUNNING HEAD: Potentiometric adsorption isotherm analysis of biointerface

CORRESPONDING AUTHOR FOOTNOTE: Affiliation; Department of Materials Engineering, School of Engineering, The University of Tokyo, 7-3-1 Hongo, Bunkyo-ku, Tokyo 113-8656, Japan, TEL; +81-3-5841-1842, FAX; +81-3-5841-1842

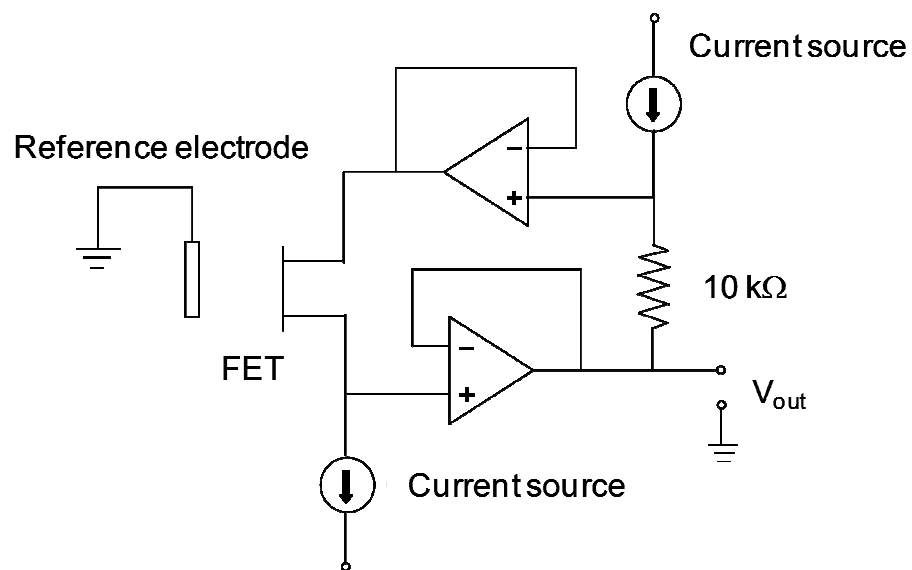

**Figure S1** Follower circuit for real-time FET measurement system<sup>S1</sup>

Reference

S1. Sakata, T.; Kamahori, M.; Miyahara, Y. DNA analysis chip based on field-effect transistors. *Jpn. J. Appl. Phys.* **2005**, *44*, 2854.
